# Supplementary material
Source: ML conference proceedings conference paper supplement (https://proceedings.mlr.press/v108/cai20a.html)
Supplement: Supplementary file 1 [file cai20a-supp.pdf]

## Supplementary Materials

### A. Proof of Theorem 1

**Proof.** Let  $\lambda_{i,t+1}$  be the  $i$ th largest eigenvalue of  $(\tilde{A}_{\mathcal{J}_{t+1}}, \tilde{B}_{\mathcal{J}_{t+1}})$ ,  $\hat{\rho}^{(t+1)}$  be the same as in Lemma 3. By the definition of  $\eta_s^{(2)}$ , we know that  $\eta_s^{(2)} \geq \lambda_{2,t+1}$ . Together with  $\rho^{(t)} > \eta_s^{(2)}$ , we have  $\rho^{(t)} > \lambda_{2,t+1}$ . On the other hand, using  $|\mathcal{J}_t \cap \text{supp}(v_1)| < k$ , we know that  $\rho^{(t)} \leq \eta_{s,k-1}^{(1)}$ . Then by Lemma 3, we have

$$\lambda_{1,t+1} - \hat{\rho}^{(t+1)} \leq (\lambda_{1,t+1} - \rho^{(t)})\epsilon_m^2 + \mathcal{O}((\lambda_{1,t+1} - \rho^{(t)})^{\frac{3}{2}}),$$

where  $\epsilon_m$  is the same as in Lemma 2. By the definition of  $\epsilon_*$ , we know that  $\epsilon_* \geq \epsilon_m$ , it follows that

$$\lambda_{1,t+1} - \hat{\rho}^{(t+1)} \leq (\lambda_{1,t+1} - \rho^{(t)})\epsilon_*^2 + \mathcal{O}((\lambda_{1,t+1} - \rho^{(t)})^{\frac{3}{2}}),$$

Now using Lemma 4, we get the conclusion.  $\square$

### B. Proof of Theorem 2

**Proof.** Noticing that  $|\text{supp}(v^{(t)})| \leq s$ , using the definition of  $\eta_{s,\ell}^{(1)}$ , we know that if  $\rho^{(t)} > \eta_{s,k-1}^{(1)}$ , then

$$|\text{supp}(v^{(t)}) \cap \text{supp}(v_1)| = k = |\text{supp}(v_1)|.$$

The conclusion follows immediately.  $\square$

### C. Proof of Theorem 3

In order to show Theorem 3, we need the following lemmas.

**Lemma 6** *Suppose  $(A, B)$  is a symmetric-definite pair. Let  $E, F$  be two symmetric matrices with  $\epsilon = \sqrt{\|E\|_2^2 + \|F\|_2^2} < c(A, B)$ . Let  $(\lambda, x)$  and  $(\tilde{\lambda}, \tilde{x})$  be the leading eigenpairs of  $(A, B)$  and  $(A + E, B + F)$ , respectively. Suppose  $\tilde{\lambda}$  is simple, and denote the smallest nonzero singular value of  $(A + E) - \tilde{\lambda}(B + F)$  by  $g$ . If  $|\tilde{\lambda}|\epsilon < c(A, B)$ , then*

$$\sin \theta(x, \tilde{x}) \leq \frac{\|B\|_2 \delta + \sqrt{1 + \tilde{\lambda}^2} \epsilon}{g},$$

where

$$\delta = \frac{(1 + \tilde{\lambda}^2)\epsilon}{c(A, B) - |\tilde{\lambda}|\epsilon}. \quad (1)$$

**Proof.** First, since  $\epsilon < c(A, B)$ , by Lemma 1,  $(A + E, B + F)$  is a definite pair and

$$\arctan(\tilde{\lambda}) - \arctan(\epsilon/c(A, B)) \leq \arctan(\lambda) \leq \arctan(\tilde{\lambda}) + \arctan(\epsilon/c(A, B)). \quad (2)$$

Using  $|\tilde{\lambda}|\epsilon < c(A, B)$ , we know that  $\arctan(\epsilon/c(A, B)) < \arctan(1/|\tilde{\lambda}|) = \frac{\pi}{2} - \arctan(|\tilde{\lambda}|)$ , which implies that the left hand side and righthand side of (2) are larger than  $-\frac{\pi}{2}$  and smaller than  $\frac{\pi}{2}$ , respectively. Then it follows from (2) that

$$\frac{\tilde{\lambda}c(A, B) - \epsilon}{c(A, B) + \tilde{\lambda}\epsilon} \leq \lambda \leq \frac{\tilde{\lambda}c(A, B) + \epsilon}{c(A, B) - \tilde{\lambda}\epsilon}.$$

Therefore,

$$|\tilde{\lambda} - \lambda| \leq \frac{(1 + \tilde{\lambda}^2)\epsilon}{c(A, B) - |\tilde{\lambda}|\epsilon} = \delta. \quad (3)$$

---

Second, without loss of generality, we set  $\|x\|_2 = \|\tilde{x}\|_2 = 1$ , let  $r = [(A + E) - \tilde{\lambda}(B + F)]x$ . Direct calculations give rise to

$$\begin{aligned} \|r\|_2 &= \|(A - \tilde{\lambda}B)x + (E - \tilde{\lambda}F)x\|_2 \leq \|(A - \lambda B)x\|_2 + |\tilde{\lambda} - \lambda|\|Bx\|_2 + \|(E - \tilde{\lambda}F)x\|_2 \\ &\leq \|B\|_2\delta + \|E\|_2 + |\tilde{\lambda}|\|F\|_2 \leq \|B\|_2\delta + \sqrt{1 + \tilde{\lambda}^2}\epsilon. \end{aligned} \quad (4)$$

On the other hand, the spectral decomposition of  $(A + E) - \tilde{\lambda}(B + F)$  can be given by  $(A + E) - \tilde{\lambda}(B + F) = V \text{diag}(0, \gamma_2, \dots, \gamma_p)V^T$ , where  $V = [\tilde{x}, V_2]$  is orthogonal,  $0 > \gamma_2 \geq \dots \geq \gamma_p$  are the eigenvalues of  $(A + E) - \tilde{\lambda}(B + F)$ . Here we used the assumption that  $\tilde{\lambda}$  is simple. Then it follows that

$$V_2^T r = V_2^T [(A + E) - \tilde{\lambda}(B + F)]x = \Gamma_2 V_2^T x, \quad (5)$$

where  $\Gamma_2 = \text{diag}(\gamma_2, \dots, \gamma_p)$ . Using (4) and (5), we get

$$\sin \theta(x, \tilde{x}) = \|V_2^T x\|_2 = \|\Gamma_2^{-1} V_2^T r\|_2 \leq \frac{\|r\|_2}{|\gamma_2|} \leq \frac{\|B\|_2\delta + \sqrt{1 + \tilde{\lambda}^2}\epsilon}{g},$$

which completes the proof. □

**Proof of Theorem 3.** Notice that  $(\lambda_1, (v_1)_{\mathcal{J}_t})$  and  $(\rho^{(t)}, (v^{(t)})_{\mathcal{J}_t})$  are the leading eigenpairs of  $(A_{\mathcal{J}_t}, B_{\mathcal{J}_t})$  and  $(\tilde{A}_{\mathcal{J}_t}, \tilde{B}_{\mathcal{J}_t})$ , respectively. Then (a) and (b) follow from Lemma 1 and Lemma 6, respectively. This completes the proof. □
